# Supplementary material for: Evanescent wave interactions with nanoparticles on optical fiber modulate side emission of germicidal ultraviolet light
Source: Royal Society of Chemistry journal article supplement (doi:10.1039/d1en00199j), 2021-01-01
Supplement: d1en00199j1.pdf [file d1en00199j1.pdf]

## Supporting information

### **Evanescent wave interaction with nanoparticles on optical fiber modulate side emission of germicidal ultraviolet light**

Zhe Zhao<sup>1</sup>, Mariana Lanzarini-Lopes<sup>1</sup>, Emma Westerhoff<sup>3</sup>, Xiangxing Long<sup>1,2</sup>, Hojung Rho<sup>1,5</sup>,  
Yuqiang Bi<sup>1</sup>, Li Ling<sup>4</sup>, Paul Westerhoff<sup>1\*</sup>

<sup>1</sup> NSF Nanosystems Engineering Research Center for Nanotechnology-Enabled Water Treatment, School of Sustainable Engineering and the Built Environment, Ira A. Fulton Schools of Engineering, Arizona State University, Tempe, AZ 85287-3005, USA

<sup>2</sup> Biodesign Swette Center for Environmental Biotechnology, Arizona State University, Tempe, AZ 85287-5701, USA

<sup>3</sup> Olin College, Needham, MA 02492, USA

<sup>4</sup> Department of Civil and Environmental Engineering, Hong Kong University of Science and Technology, Hong Kong, China

<sup>5</sup> Department of Land, Water and Environment Research, Korea Institute of Civil Engineering and Building Technology, 283 Goyang-Daero, Ilsanseo-Gu, Goyang-Si, Gyeonggi-Do, 10223, Republic of Korea

\*Corresponding author:

orcid ID: 0000-0002-9241-8759

Email: [p.westerhoff@asu.edu](mailto:p.westerhoff@asu.edu)

Phone: 480-965-2885

In preparation: *Environmental Science Nano*

**Table SI.1** Calculated/linearly fitted scattering coefficient ( $\alpha$ ) along the side-emitting optical fiber treated with different concentration of  $\text{Na}_2\text{SO}_4$ .

| Fiber length (cm) / Scattering coefficient ( $\alpha$ ) / $[\text{Na}_2\text{SO}_4]$ (mol/L) | 0     | 0.02  | 0.05  | 0.10  | 0.15  | 0.20  |
|----------------------------------------------------------------------------------------------|-------|-------|-------|-------|-------|-------|
| 2                                                                                            | 0.139 | 0.191 | 0.217 | 0.268 | 0.374 | 0.356 |
| 4                                                                                            | 0.109 | 0.193 | 0.188 | 0.248 | 0.364 | 0.392 |
| 6                                                                                            | 0.122 | 0.149 | 0.198 | 0.210 | 0.370 | 0.378 |
| Average                                                                                      | 0.123 | 0.178 | 0.201 | 0.242 | 0.369 | 0.375 |
| Standard deviation                                                                           | 0.015 | 0.025 | 0.015 | 0.029 | 0.005 | 0.018 |
| Linearly fitted $\alpha$                                                                     | 0.137 | 0.163 | 0.201 | 0.265 | 0.329 | 0.394 |

Because the scattering coefficient depends on fiber properties and coating layers, the value on each concentration remains a constant at any length of the fiber, and results were linearly fitted from 0 M to 0.2 M. Based on the irradiance results and Equation (3), the scattering coefficient ( $\alpha$ ) was calculated at a distance of  $\Delta x=2$  cm (Figure 2f) because we measured the light intensity at every 2 cm. Table SI.1 shows the calculated and linearly fitted scattering coefficients at different SEOF positions (2, 4, and 6 cm) treated with different ionic strengths. Because a portion of light was reflected back at the distal end, the scattering coefficient at 8 cm was not considered. There is no significant difference between fitted data and experimental data ( $p<0.05$ ). The  $\alpha$  increased from 0.123 to 0.375 when the concentration of  $\text{Na}_2\text{SO}_4$  increased from 0 to 0.2 M. Further increasing the ionic strength after the concentration of  $\text{Na}_2\text{SO}_4$  reached 0.2 M did not keep increasing the scattering coefficient.

**Table SI.2** Calculated UC of SEOF under different  $\text{Na}_2\text{SO}_4$  concentrations.

| $[\text{Na}_2\text{SO}_4]$ (mol/L) | 0     | 0.02  | 0.05  | 0.10  | 0.15  | 0.20  | Modified SEOF |
|------------------------------------|-------|-------|-------|-------|-------|-------|---------------|
| UC                                 | 0.523 | 0.417 | 0.363 | 0.309 | 0.166 | 0.134 | 0.805         |

**Table SI.3** Calculated scattering coefficient ( $\alpha$ ) from the modelling data along the SEOF with the separation distance from 1 to 100 nm

| Separation distance( $\alpha$ ) /<br>Scattering coefficient ( $\alpha$ )/<br>Fiber length (cm) | 2     | 4      | 6      | 8     | Average | Standard<br>deviation |
|------------------------------------------------------------------------------------------------|-------|--------|--------|-------|---------|-----------------------|
| 1                                                                                              | 0.671 | 0.463  | 0.387  | 0.427 | 0.487   | 0.127                 |
| 5                                                                                              | 0.550 | 0.417  | 0.316  | 0.325 | 0.402   | 0.109                 |
| 10                                                                                             | 0.428 | 0.344  | 0.259  | 0.344 | 0.344   | 0.069                 |
| 15                                                                                             | 0.335 | 0.285  | 0.229  | 0.280 | 0.283   | 0.044                 |
| 20                                                                                             | 0.262 | 0.230  | 0.177  | 0.255 | 0.231   | 0.039                 |
| 25                                                                                             | 0.205 | 0.169  | 0.153  | 0.191 | 0.179   | 0.023                 |
| 30                                                                                             | 0.152 | 0.130  | 0.102  | 0.179 | 0.141   | 0.033                 |
| 35                                                                                             | 0.131 | 0.102  | 0.086  | 0.131 | 0.113   | 0.022                 |
| 40                                                                                             | 0.116 | 0.065  | 0.092  | 0.096 | 0.092   | 0.021                 |
| 45                                                                                             | 0.089 | 0.065  | 0.053  | 0.094 | 0.075   | 0.020                 |
| 50                                                                                             | 0.076 | 0.043  | 0.034  | 0.091 | 0.061   | 0.027                 |
| 55                                                                                             | 0.066 | 0.036  | 0.042  | 0.051 | 0.049   | 0.013                 |
| 60                                                                                             | 0.067 | 0.026  | 0.027  | 0.063 | 0.046   | 0.023                 |
| 65                                                                                             | 0.054 | 0.023  | 0.011  | 0.060 | 0.037   | 0.024                 |
| 70                                                                                             | 0.034 | 0.035  | -0.006 | 0.074 | 0.034   | 0.033                 |
| 75                                                                                             | 0.035 | 0.012  | -0.001 | 0.063 | 0.027   | 0.028                 |
| 80                                                                                             | 0.060 | -0.004 | 0.005  | 0.043 | 0.026   | 0.030                 |
| 85                                                                                             | 0.053 | 0.008  | 0.000  | 0.039 | 0.025   | 0.025                 |
| 90                                                                                             | 0.013 | 0.015  | 0.006  | 0.058 | 0.023   | 0.024                 |
| 95                                                                                             | 0.050 | 0.003  | -0.016 | 0.057 | 0.023   | 0.036                 |
| 100                                                                                            | 0.023 | 0.016  | -0.002 | 0.043 | 0.020   | 0.018                 |

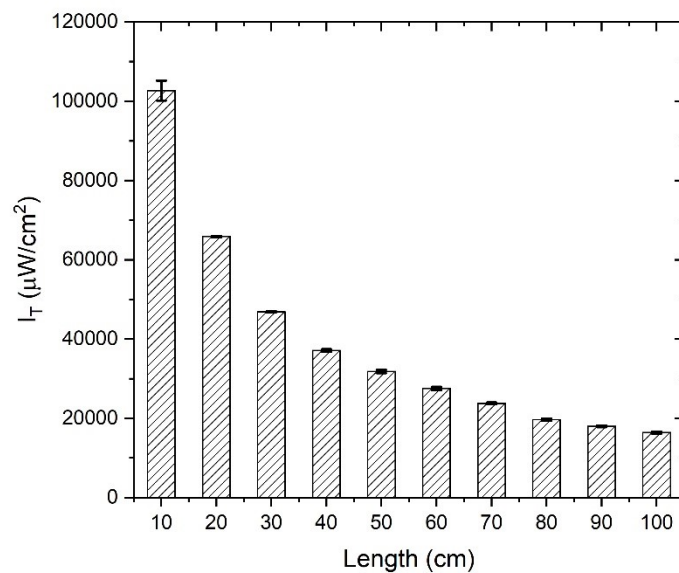

**Figure SI.1** UV-C light attenuation inside the high-OH Thorlabs optical fiber. The distance between fiber cut end and LED is zero.

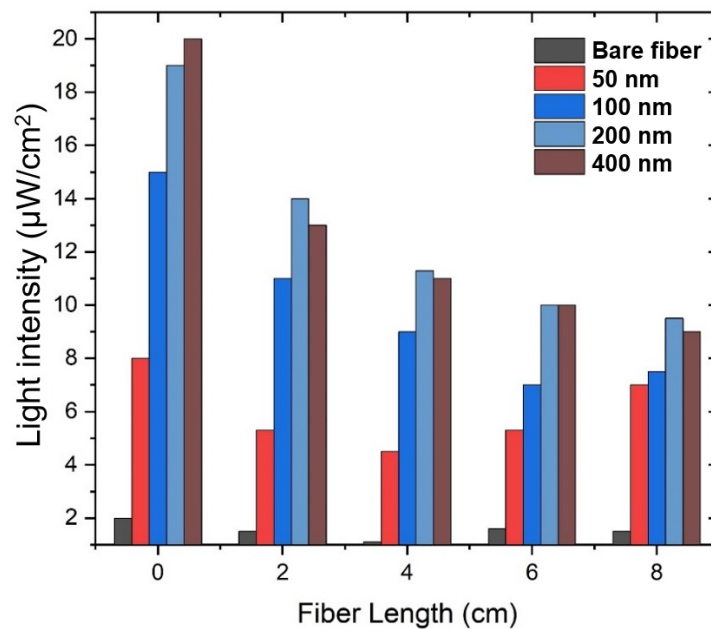

**Figure SI.2** Effect of nanoparticle size on 265 nm UV-C LED launched optical fibers.

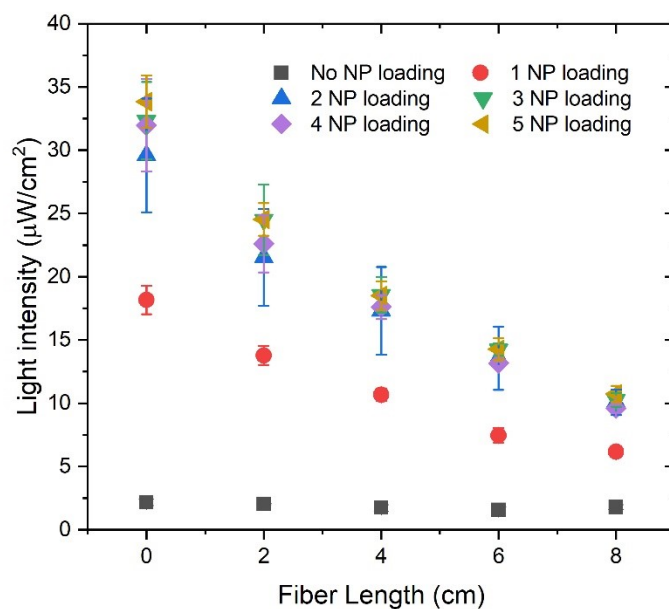

**Figure SI.3** Effect of nanoparticle loading on 265 nm UV-C LED launched optical fibers.

Particle loading was varied by the number of dip-coating cycles. Each dipping cycle resulted in  $(0.41 \mu\text{g}/\text{mm}^2 \pm 6\%)$  additional loading for 200 nm silica NPs.

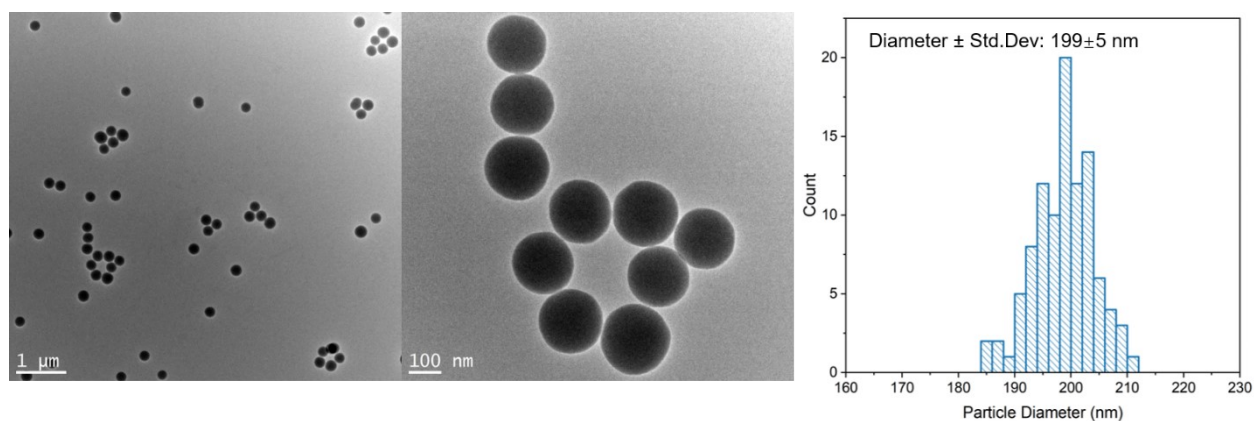

**Figure SI.4** TEM images and the size distribution of silica sphere nanoparticles.

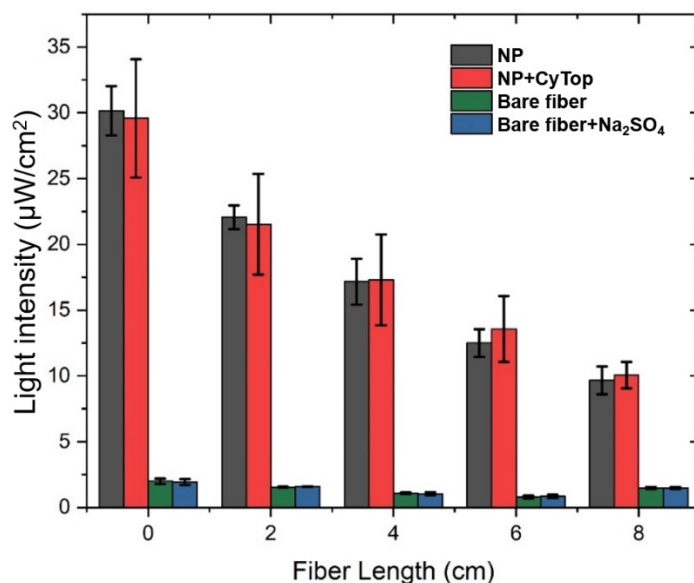

**Figure SI.5** Light irradiance measured at different distances along the optical fiber with 200 nm nanoparticles, 200 nm nanoparticles with CyTop™ polymer, without NP (bare fiber), and bare fiber with Na<sub>2</sub>SO<sub>4</sub>.

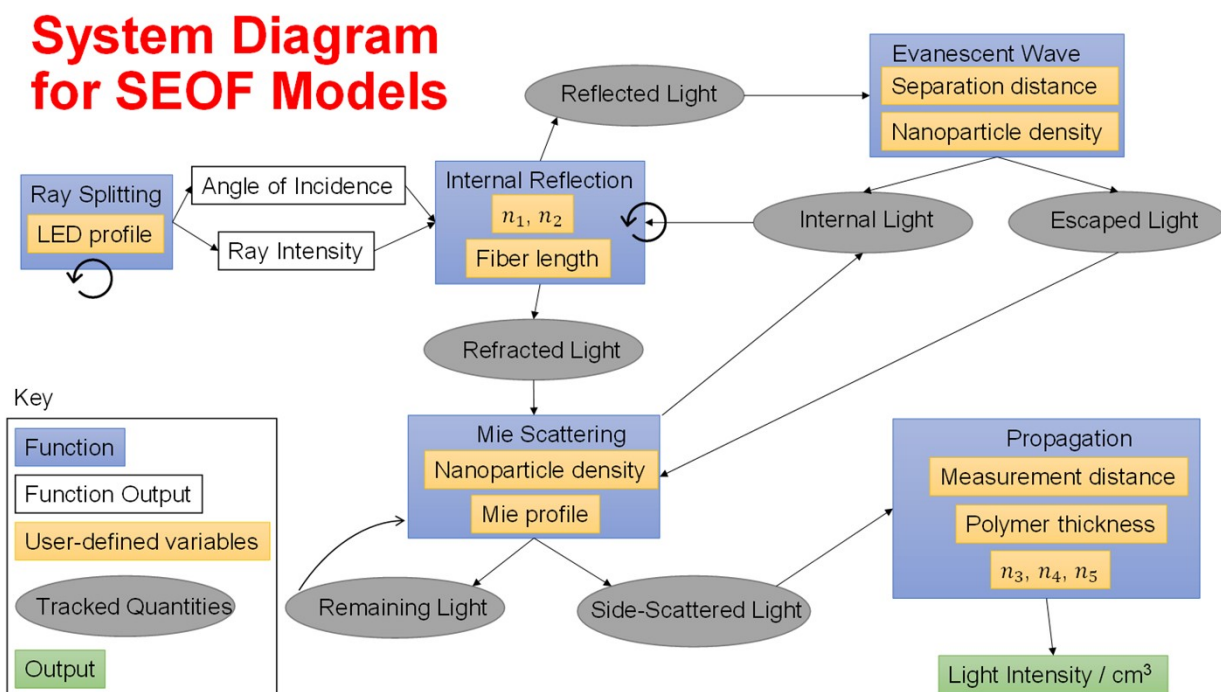

**Figure SI.6** System diagram of SEOF scattering efficiency model.

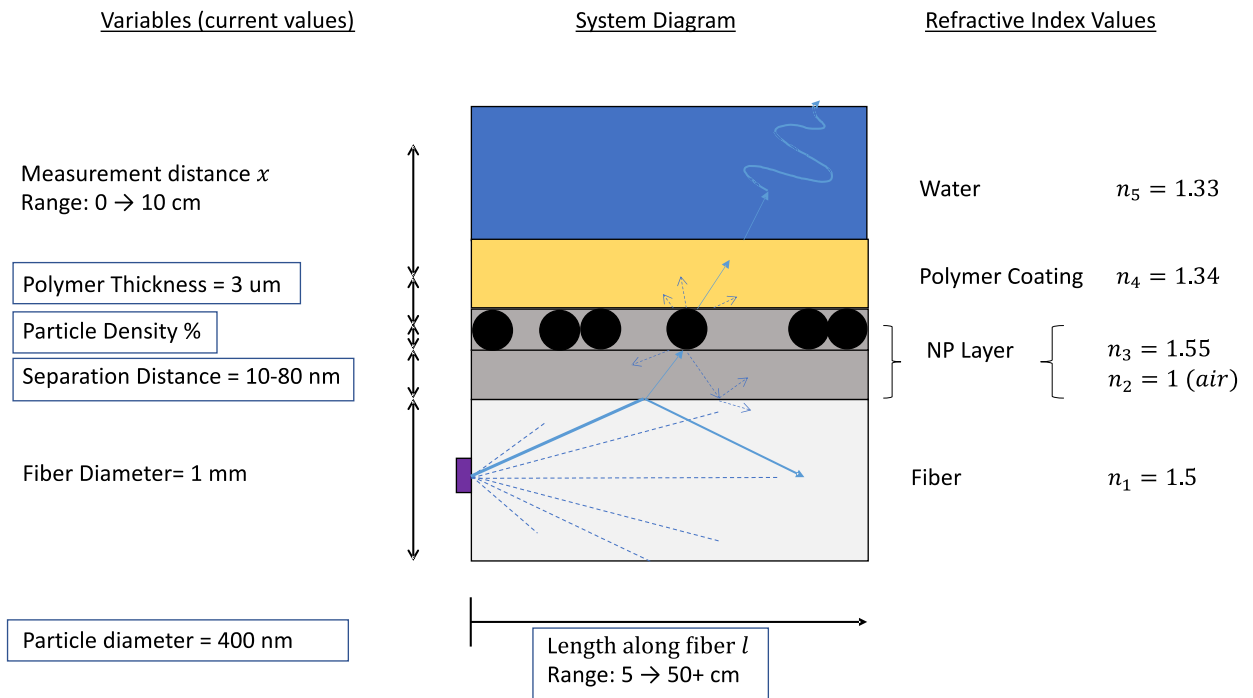

**Figure SI.7** Scattering efficiency model variables and input parameters.

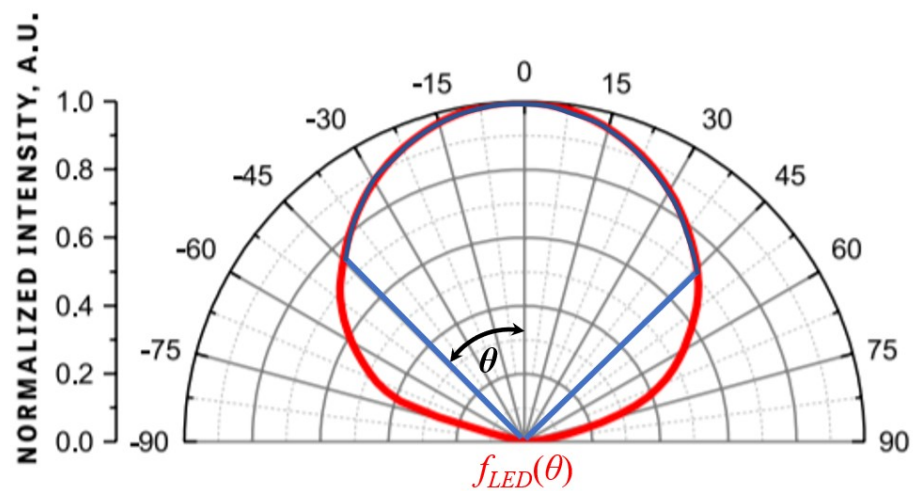

**Figure SI.8** Radiation pattern of UV-C LED in the first principle model.

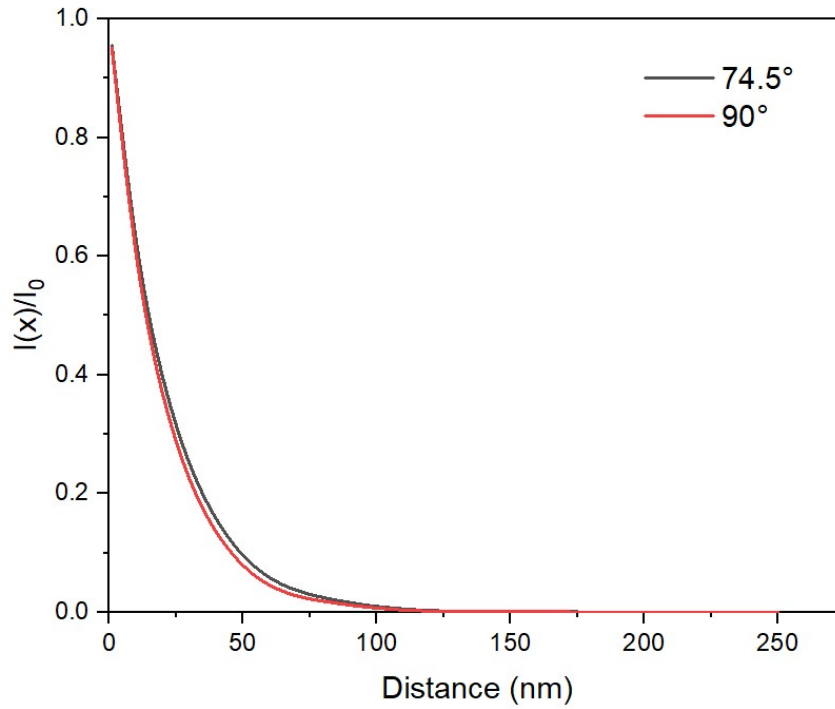

**Figure SI.9** Evanescent wave intensity as a function of radial distance (nm) from the optical fiber surface for 265 nm light at an incident angle of 90° and 74.5° (minimum).

## DLVO and Energy barrier calculation

Hamaker constant ( $A_{312}$ )

$$A_{312} = (\sqrt{A_{33}} - \sqrt{A_{11}})(\sqrt{A_{22}} - \sqrt{A_{11}})$$

Where  $A_{11}$  for water =  $4.35 \times 10^{-20}$

$A_{22}$  for glass fiber =  $6 \times 10^{-20}$

$A_{33}$  for aminated silica =  $6.5 \times 10^{-20}$

$$A_{312} = 1.688 \times 10^{-21}$$

Use the following relationships:

$$\psi_{LVW} = \frac{-A_{312}a_1a_2}{6(a_1 + a_2)H_0}$$

$$\psi_{DL} = \epsilon_{EPS} \times \frac{a_1a_2(\psi_1^2 + \psi_2^2)}{4(a_1 + a_2)} \left[ \frac{2\psi_1\psi_2}{(\psi_1^2 + \psi_2^2)} \ln\left(\frac{1 + e^{-kH_0}}{1 - e^{-kH_0}}\right) + \ln(1 - e^{-2kH_0}) \right]$$

$$\psi_{TOTAL} = \psi_{LVW} + \psi_{DL}$$

Where  $\psi_{LVW}$  is the potential for attraction by London van der waals forces

$\Psi_{DL}$  is the potential for repulsion due to double layer repulsion

Radii of glass fiber  $a_1=5*10^{-4}$  m

Radii of aminated silica particles  $a_2=10^{-7}$  m

Surface potential for glass fiber  $\psi_1=-0.065$ V

Surface potential for aminated silica  $\psi_2=+0.028$ V

$$\epsilon_{EPS} = 7*10^{-10}$$

**Table SI.4** Thickness of electrical double layer versus ionic strength.

| Ionic strength (M) | Thickness of electrical double layer $1/k$ (nm) |
|--------------------|-------------------------------------------------|
| 0.06               | 1.143                                           |
| 0.15               | 0.723                                           |
| 0.30               | 0.511                                           |
| 0.45               | 0.417                                           |
| 0.60               | 0.361                                           |

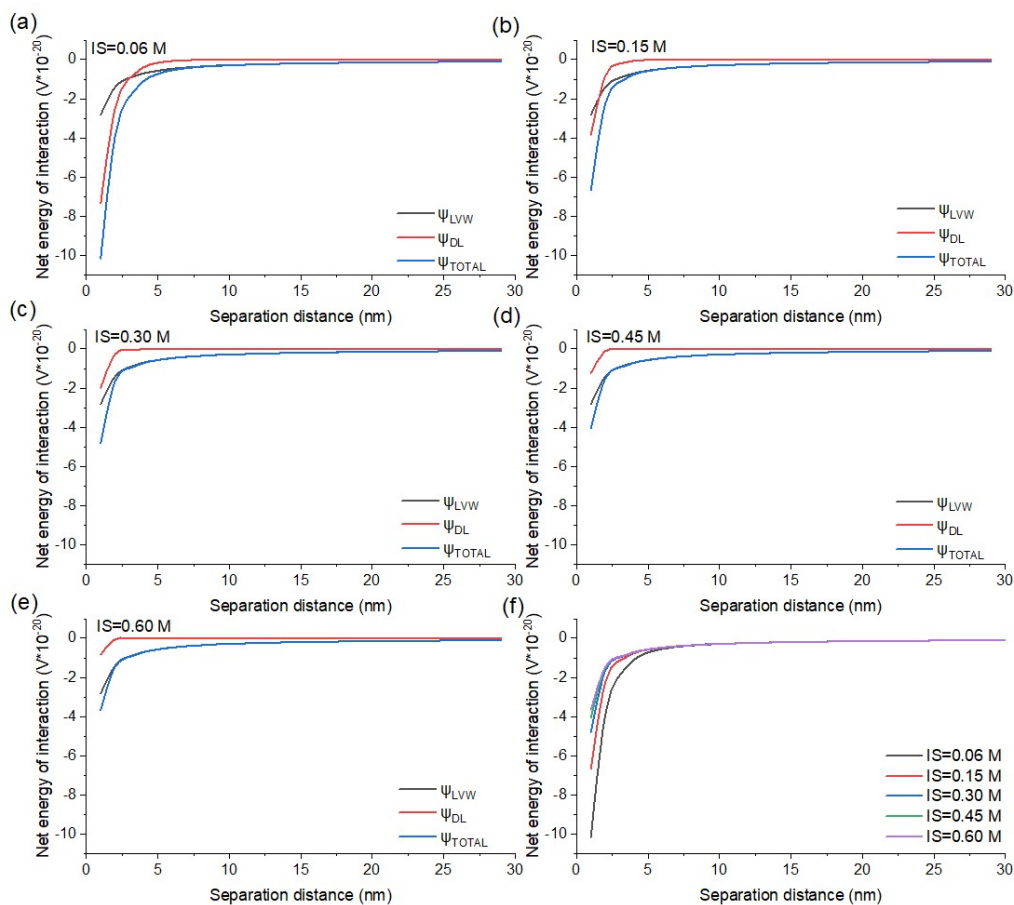

**Figure SI.10** Energy of interaction between fiber interface and aminated silica nanoparticles with separation distance under ionic strength at (a) 0.06 M, (b) 0.15 M, (c) 0.30 M, (d) 0.45 M, and (e) 0.60 M. (f) shows the net energy of interaction under ionic strength from 0.06 M to 0.60 M.  $\Psi_{LVW}$ ,  $\Psi_{DL}$  and  $\Psi_{TOTAL}$  represents the potential for attraction by London van der Waals forces, potential for repulsion due to double layer repulsion and total energy barrier, respectively.

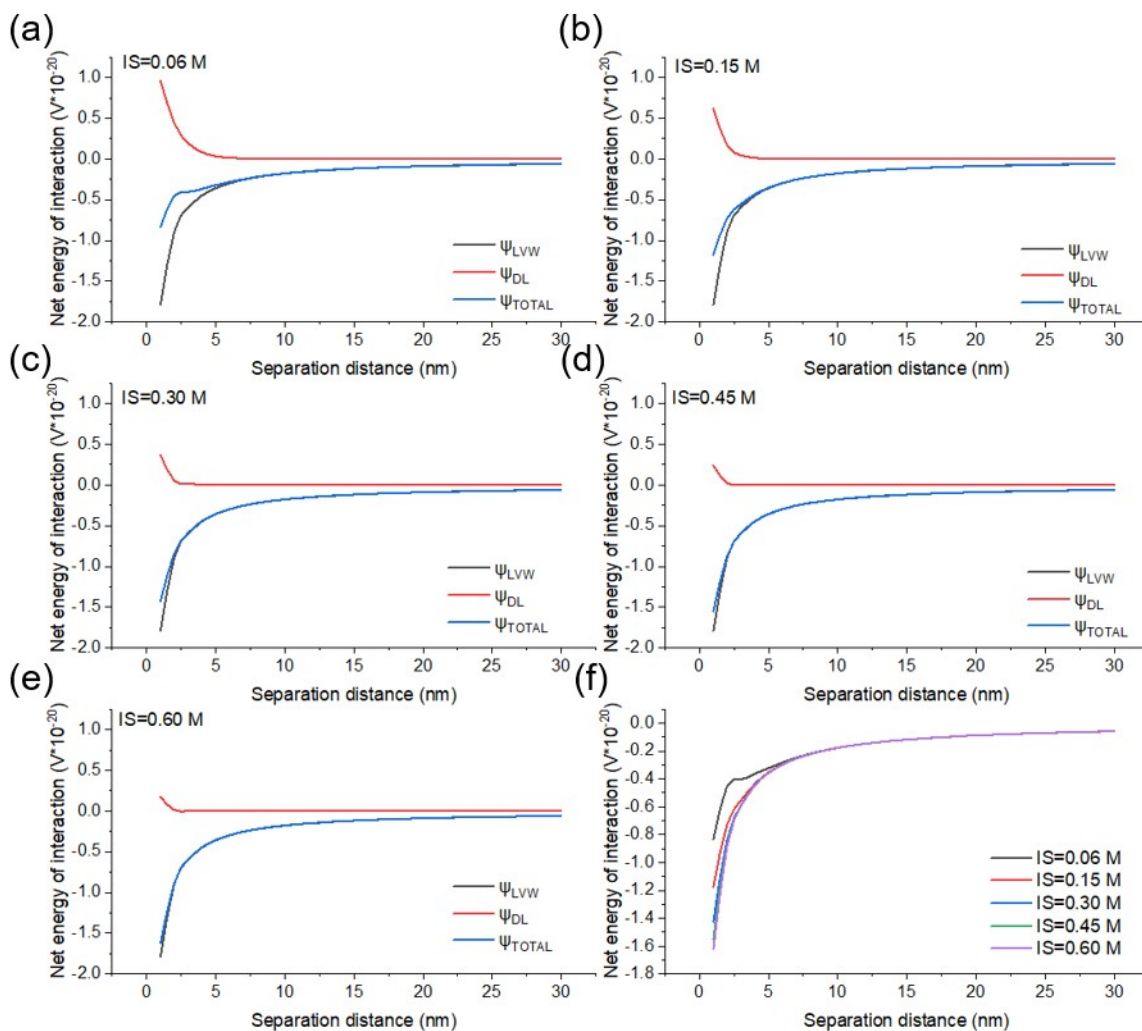

**Figure SI.11** Energy of interaction between two aminated silica nanoparticles with separation distance under ionic strength at (a) 0.06 M, (b) 0.15 M, (c) 0.30 M, (d) 0.45 M, and (e) 0.60 M. (f) shows the net energy of interaction under ionic strength from 0.06 M to 0.60 M.  $\Psi_{LVW}$ ,  $\Psi_{DL}$  and  $\Psi_{TOTAL}$  represents the potential for attraction by London van der Waals forces, potential for repulsion due to double layer repulsion and total energy barrier, respectively.

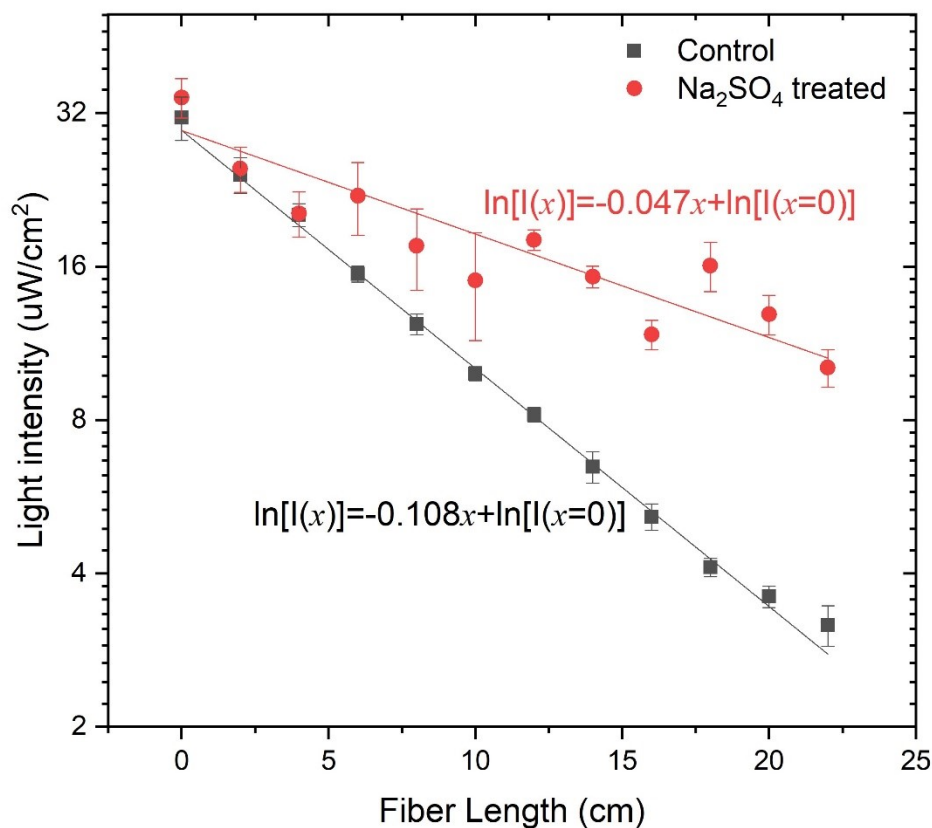

**Figure SI.12** Natural logarithm fit of light intensity along optical fiber with and without different concentration of ionic strength treatment. Slope of fitted equation represents the scattering coefficient ( $\alpha$ ) at each condition.

**Table SI.5** Comparison between proposed method with other methods reported in literature.

| Application       | Type of Nanoparticle | Fiber Length | UC value | Wavelength utilized in fiber | Reference                             |
|-------------------|----------------------|--------------|----------|------------------------------|---------------------------------------|
| UV-C disinfection | SiO <sub>2</sub>     | >30 cm       | 0.52     | 265 nm                       | This work                             |
|                   | SiO <sub>2</sub>     | 10 cm        | 0.15     | 265 nm                       | Lopez et al. 2020 <sup>[1]</sup>      |
| Photo-catalysis   | TiO <sub>2</sub>     | 10 cm        | 0.04     | 365 nm                       | Wang et al. 2003 <sup>[2]</sup>       |
|                   | TiO <sub>2</sub>     | 6.5 cm       | 0.14     | 365 nm                       | Song et al. 2021 <sup>[3]</sup>       |
|                   | TiO <sub>2</sub>     | 48 cm        | <0.1     | 365 nm                       | Hofstadler et al. 1994 <sup>[4]</sup> |
|                   | TiO <sub>2</sub>     | 15 cm        | 0.05     | 375 nm                       | Peill et al. 1998 <sup>[5]</sup>      |

## Reference:

- [1] M. Lanzarini-Lopes, Z. Zhao, F. Perreault, S. Garcia-Segura and P. Westerhoff, Germicidal glowsticks: Side-emitting optical fibers inhibit *Pseudomonas aeruginosa* and *Escherichia coli* on surfaces, *Water Research*, 2020, **184**, 116191.
- [2] W. Wen, and Young Ku, The light transmission and distribution in an optical fiber coated with TiO<sub>2</sub> particles, *Chemosphere*, 2003, **50**, 999-1006.
- [3] Y. Song, L. Ling, P. Westerhoff and C. Shang, Evanescent waves modulate energy efficiency of photocatalysis within TiO<sub>2</sub> coated optical fibers illuminated using LEDs, *Nature Communications*, 2021, **12**, 4101.
- [4] K. Hofstadler, R. Bauer, S. Novallc and G. Heisler, New reactor design for photocatalytic wastewater treatment with TiO<sub>2</sub> immobilized on fused-silica glass fibers: photomineralization of 4-chlorophenol, *Environmental Science and Technology*, 1994, **28**, 670–674.
- [5] N. Peill and M. Hoffmann, Mathematical Model of a Photocatalytic Fiber-Optic Cable Reactor for Heterogeneous Photocatalysis, *Environmental Science and Technology*, 1998, **32**, 398–404.
